# Supplementary material for: Steady analyses of potassium stable isotopes using a Thermo Scientific Neoma MC-ICP-MS
Source: Royal Society of Chemistry journal article supplement (doi:10.1039/d2ja00050d), 2022-01-01
Supplement: d2ja00050d1.pdf [file d2ja00050d1.pdf]

**Table S1:** comparison of the different setups discussed in the study

|                                | <b>This study</b>            | <b>Chen et al. [13]</b>    | <b>Moynier et al. [14]</b> | <b>Li et al. [8]</b>          | <b>Hobin et al. [18]</b>  | <b>Gu et al. [4]</b> |
|--------------------------------|------------------------------|----------------------------|----------------------------|-------------------------------|---------------------------|----------------------|
| Instrument                     | Neoma                        | Sapphire                   | Sapphire                   | Nu Plasma 3<br>(Dummy bucket) | Neptune +                 | Neptune +            |
| Mass resolution                | >15,000<br>(XHR)             | ~400 (LR)                  | LR                         | >10,000<br>(pseudo HR)        | ~15,000 (XHR)             | ~1000 (LR)           |
| RF power (W)                   | 1200                         | 1300                       | 1300                       | 700                           | 800                       | 600                  |
| Introduction system            | Dry<br>plasma<br>(Aridus II) | Dry plasma<br>(Apex Omega) | Dry plasma (Apex<br>Omega) | Dry plasma<br>(Aridus III)    | Dry plasma<br>(Aridus II) | Wet plasma           |
| Sensitivity (V/ppm)            | ~40                          | ~1200                      | ~2000                      | ~5                            | ~6                        | #                    |
| Short-term repeatability (‰) * | 0.06 (2SD)                   | 0.01-0.04 (2SE)            | #                          | #                             | 0.03 (2SD)                | #                    |
| Intermediate precision (‰) **  | 0.07 (2SD)                   | 0.07 (2SD)                 | 0.04 (2SD)                 | 0.06 (2SD)                    | 0.06 (2SD)                | 0.08 (2SD)           |

\* aka "short-term external precision"

\*\* aka "long-term external reproducibility"

# not reported

**Table S2: K isotope compositions discussed in the text**

| Type of sample                | Reference                  | $\delta^{41}\text{K}$ (‰) | $\pm 2$ SD | n  | Study               |
|-------------------------------|----------------------------|---------------------------|------------|----|---------------------|
| Seawater                      | IAPSO                      | 0.03                      | 0.02       | 2  | This study          |
| Tuna fish                     | ERM-CE 464                 | 0.38                      | 0.01       | 2  | This study          |
| Fish protein                  | DORM-4                     | -0.24                     | 0.03       | 2  | This study          |
| Lobster hepatopancreas        | TORT-3                     | -0.29                     | 0.03       | 2  | This study          |
| Granite                       | GA                         | -0.50                     |            | 1  | This study          |
| Basalt                        | BCR-1                      | -0.40                     |            | 1  | This study          |
| Basalt                        | BHVO-2                     | -0.40                     |            | 1  | This study          |
| Green Beans                   | BCR-383                    | -0.84                     | 0.07       | 2  | This study          |
| Rye grass                     | ERM-CD 281                 | -0.23                     |            | 1  | This study          |
| Bovine Liver                  | SRM-1577c                  | 0.15                      | 0.00       | 2  | This study          |
| Whole milk                    | BCR-380                    | 0.07                      | 0.02       | 2  | This study          |
| Fetal Bovine Serum            | FBS                        | -2.11                     |            | 1  | This study          |
| Human Plasma                  |                            | -0.09                     |            | 1  | This study          |
| Human serum control           |                            | 0.08                      |            | 1  | This study          |
| Human serum control           |                            | 0.09                      |            | 1  | This study          |
| Human serum control           |                            | -0.47                     |            | 1  | This study          |
| Human serum control           |                            | -0.67                     |            | 1  | This study          |
| Human serum control           |                            | -0.33                     |            | 1  | This study          |
| Human serum control           |                            | 0.08                      |            | 1  | This study          |
| Human serum control           |                            | -0.09                     |            | 1  | This study          |
| Human serum control           |                            | -0.13                     |            | 1  | This study          |
| Human serum control           |                            | -0.18                     |            | 1  | This study          |
| Human serum control           |                            | -0.39                     |            | 1  | This study          |
| Human serum cancer            |                            | -0.59                     |            | 1  | This study          |
| Human serum cancer            |                            | 0.13                      |            | 1  | This study          |
| Human serum cancer            |                            | -0.08                     |            | 1  | This study          |
| Human serum cancer            |                            | -0.31                     |            | 1  | This study          |
| Human serum cancer            |                            | 0.09                      |            | 1  | This study          |
| Human serum cancer            |                            | -0.13                     |            | 1  | This study          |
| Human serum cancer            |                            | -0.59                     |            | 1  | This study          |
| Human serum cancer            |                            | -0.84                     |            | 1  | This study          |
| Human serum cancer            |                            | -0.39                     |            | 1  | This study          |
| Seawater                      |                            | 0.11                      | 0.02       | 4  | Chen et al. [13]    |
| Basalt                        | BHVO-2                     | -0.48                     | 0.03       | 4  | Chen et al. [13]    |
| Basalt                        | BCR-1                      | -0.49                     | 0.05       | 1  | Chen et al. [3]     |
| Basalt                        | BHVO-2                     | -0.46                     | 0.04       | 1  | Chen et al. [3]     |
| Lobster hepatopancreas        | TORT-3                     | -0.31                     | 0.03       | 3  | Hobin et al. [18]   |
| Basalt                        | BHVO-2                     | -0.38                     | 0.04       | 1  | Hobin et al. [18]   |
| Bovine muscle                 | BCR-184                    | -0.52                     | 0.02       | 5  | Hobin et al. [18]   |
| Serum                         | SeronormTM Serum           | -0.30                     | 0.04       | 5  | Hobin et al. [18]   |
| Whole blood                   | SeronormTM Whole blood     | 0.89                      | 0.02       | 5  | Hobin et al. [18]   |
| CSF                           | Randox Cerebrospinal fluid | -0.13                     | 0.03       | 5  | Hobin et al. [18]   |
| Hawaiian seawater             |                            | 0.14                      | 0.05       | 2  | Hu et al. [5]       |
| Basalt                        | BCR-1                      | -0.42                     |            | 1  | Hu et al. [5]       |
| bush leaves                   | (GSV-2)                    | 0.04                      |            | 1  | Li et al. [8]       |
| spinach leaves                | (GSB-6)                    | -0.20                     |            | 1  | Li et al. [8]       |
| laver                         | (GSB-14)                   | 0.25                      |            | 1  | Li et al. [8]       |
| Sea weed (Laminaria japonica) |                            | 0.57                      |            | 1  | Li [31]             |
| Sea weed (Porphyra)           |                            | 1.11                      |            | 1  | Li [31]             |
| Fish                          |                            | -0.56                     |            | 1  | Li [31]             |
| Clam                          |                            | 0.97                      |            | 1  | Li [31]             |
| Jelly fish                    |                            | -0.24                     |            | 1  | Li [31]             |
| Daisy flower                  |                            | -1.30                     |            | 1  | Li [31]             |
| Corn seeds                    |                            | -0.34                     |            | 1  | Li [31]             |
| Beef                          |                            | -0.19                     |            | 1  | Li [31]             |
| Seawater                      |                            | 0.08                      | 0.14       | 3  | Li et al. [11]      |
| Basalt                        | BCR-1                      | -0.25                     |            | 1  | Li et al. [11]      |
| Basalt                        | BHVO-2                     | -0.35                     |            | 1  | Li et al. [11]      |
| Chili pepper                  |                            | -0.90                     |            | 1  | Li et al. [11]      |
| Rice grain                    |                            | -0.98                     |            | 1  | Li et al. [11]      |
| Wolfberry fruit               |                            | -1.12                     |            | 1  | Li et al. [11]      |
| Tea leaf                      |                            | -1.26                     |            | 1  | Li et al. [11]      |
| Prawn                         |                            | -0.36                     |            | 1  | Morgan et al. [6]   |
| Haddock                       |                            | -0.08                     |            | 1  | Morgan et al. [6]   |
| Scallop muscle                |                            | 0.36                      |            | 1  | Morgan et al. [6]   |
| Basalt                        | BHVO-2                     | -0.52                     |            | 1  | Morgan et al. [6]   |
| Banana                        |                            | -0.38                     |            | 1  | Morgan et al. [6]   |
| Potato                        |                            | 0.10                      |            | 1  | Morgan et al. [6]   |
| Lamb                          |                            | -0.88                     |            | 1  | Morgan et al. [6]   |
| Beef                          |                            | -0.47                     |            | 1  | Morgan et al. [6]   |
| Granite                       | GA                         | -0.45                     |            | 1  | Moynier et al. [15] |
| Basalt                        | BHVO-2                     | -0.43                     | 0.04       | 3  | Moynier et al. [15] |
| Seawater                      |                            | 0.14                      |            | 1  | Moynier et al. [15] |
| Tuna fish                     | ERM-CE464                  | 0.31                      | 0.05       | 2  | Moynier et al. [14] |
| Mussel tissue                 | BCR668                     | 0.53                      | 0.02       | 2  | Moynier et al. [14] |
| Bovine muscle                 | ERM-BB184                  | 0.99                      | 0.06       | 2  | Moynier et al. [14] |
| Bovine blood                  | ERM-CE196                  | 0.07                      | 0.04       |    | Moynier et al. [14] |
| Bovine liver                  | ERM-BB185                  | 0.22                      | 0.06       |    | Moynier et al. [14] |
| Pig kidney                    | ERM-BB186                  | 0.34                      | 0.09       |    | Moynier et al. [14] |
| Pig muscle                    | ERM-BB124                  | 0.33                      | 0.05       |    | Moynier et al. [14] |
| Seawater                      |                            | 0.12                      | 0.07       | 46 | Wang et al. [25]    |
